# Supplementary material for: Optimal duration of antibiotics therapy after Video-assisted thoracoscopic surgery in thoracic empyema and complicated parapneumonic effusion
Source: Research Square preprint supplement (doi:10.21203/rs.3.rs-997272/v2), 2022-03-23
Supplement: Supplementary file 1 [file 804aa28583f9381cacd5ff2e.xlsx]

## Sheet: Sheet1
				comorbidity
case	age	WBC count	CRP	cerebrobascular	cardiovascular	mental illness	diabetes mellitus	time from the onset(day)	post-hospital stay(day)	PS	post operative morbidity	bacterial culture	post-operative antibiotics (day)	post-operative drainage(day)	BT<37.5℃(day)	BT<37.0℃(day)	WBC>1万(day)
1	61	18320	26.33		hypertension			13	8	0		-	7	7	unknown	unknown	10
2	62	26640	29.36					8	12	1		-	3	3	unknown	unknown	1
3	63	27180	33.73					9	25	0		streptococcus anginosus	6	9	14	15	22
4	54	13170	15.46					12	25	0	recurrence	-	6	2	unknown	unknown	14
5	66	49960	42.35		cardiac infarction			9	15	3	respiratory failure	-	4	7	18	21	9
6	61	21950	27.94					5	19	0		-	5	5	7	14	3
7	64	10020	16.86	cerebral hemorrhage/infariction			yes	6	22	3	respiratory failure	-	6	6	3	4	4
8	80	20800	7.36					13	14	1		-	14	5	1	2	1
9	28	26250	12.74	conversion				14	16	0	hematoma	anaerobic bacteria	2	6	3	7	5
10	71	12260	27.59			schizophrenia		12	19	0	respiratory failure	-	10	7	0	0	4
11	67	8190	12.74				yes	12	12	0		-	5	2	1	3	3
12	57	12710	8.46	infarction	heart failure, severe arrhythmia			24	9	0		-	8	5	1	2	6
13	59	11970	28.92		ASO		yes	30	14	0		streptococcus intermedius	4	10	6	12	9
14	48	15360	17.91			schizophrenia		30	16	0	celebral infarction	fusobakuterium nucleatum	8	2	0	0	5
15	88	15400	18.75			depression		14	13	3	recurrence	-	10	43	4	5	5
16	60	10550	7.52					27	22	0		staphylococcs aureus	13	4	6	9	1
17	60	15200	22.79					3	8	1		streptococcus intermedius	13	12	7	9	1
18	51	33120	17.5			schizophrenia		30	18	0		streptococcus intermedius	8	7	6	8	4
19	56	10430	25.44			schizophrenia	yes	20	11	0		-	7	4	2	9	4
20	65	26640	32				yes	21	22	1		-	7	17	8	9	14
21	65	21950	18.7				yes	12	7	1		streptococcus intermedius	11	6	2	4	12
22	64	4810	4.26					37	14	1		-	12	4	0	0	1
23	60	21790	31.56				yes	25	39	0		fusobakuterium nucleatum,peptostrptococcus micros	3	5	10	36	18
24	82	6990	23.14					17	9	0		-	7	8	1	1	1
25	70	8880	13.48					6	11	0		neieria	0	6	3	4	3
26	66	23110	31.13		hypertension			4	18	0		strepotococus anginosus	4	4	10	11	3
27	72	6040	3.44					14	51	0		-	8	3	0	0	1
28	54	18580	8.65		hypertension		yes	7	7	0	pregression to chronic empyema	-	2	14	10	12	10
29	47	12460	31.8					17	19	0		-	9	8	5	7	1
30	63	12510	28.65				yes	13	11	0		-	5	6	2	3	15
31	80	7010	17.26					10	16	0		streptococcus viridance, prevotella oris	6	7	3	12	1
32	47	12180	18.79				yes	17	8	0		-	7	5	2	2	5
33	69	1300	11.05					13	10	0		-	3	5	1	2	7
