# Supplementary material for: Optimal duration of antibiotics therapy after Video-assisted thoracoscopic surgery in thoracic empyema and complicated parapneumonic effusion
Source: Research Square preprint supplement (doi:10.21203/rs.3.rs-997272/v2), 2022-03-23
Supplement: Supplementary file 2 [file 6cc79d1699209bb0ac9b9887.xlsx]

## Sheet: Sheet1
Suppulementary Table 1. Characterisitics of the patients
	n(%)	mean±SD	median (range)
Epidemiological data
male/female	28(85)/5(15)
age (years)		62±11	63 (28-88)
Comorbidity	22 (67)
diabetes	9 (27)
cardiovascular	7 (21)
cerebrovascular	3 (9)
mental disorder	6 (18)
COPD	1 (3)
cancer bearing	1 (3)
use of steroids	1 (3)
Ecog Performance Status
0-1/2-3	30 (91)/3(9)
Time from the onset to operation (days)		15±9	13
Laboraory examination
WBC (/μl)		16800±9,300	13200 (4800-50,000)
seg (%)		83.1±5.9	83.5 (70.4-94.4)
CRP (mg/dl)		20.4±9.8	18.8 (3.4-42.4)
ACCP category
3/4	24(73)/9(27)
COPD chronic obstructive pulmonary disease, WBC peripheral blood white blood cell count,
seg segmented neutrophil, CRP C-rwactive protein, ACCP American College of Chest Physicians
