# Supplementary material for: Optimal duration of antibiotics therapy after Video-assisted thoracoscopic surgery in thoracic empyema and complicated parapneumonic effusion
Source: Research Square preprint supplement (doi:10.21203/rs.3.rs-997272/v2), 2022-03-23
Supplement: Supplementary file 3 [file 8c52c0264415c57d8cdc7ad3.xlsx]

## Sheet: Sheet1
SuppulementaryTable 4. Post-operative inflammatory parameters
	mean±SD	median (range)
Body temperature
<37.5ºC	4.5±4.4	3 (0-18)
<37.0ºC	7.4±7.5	6 (0-18)
White blood Cell
<10,000/μl	6.1±5.5	4 (1-22)
seg<80%	7.1±3.9	7 (0-17)
